# Supplementary material for: Different view of solvent effect on the synthesis methods of zeolitic imidazolate framework-8 to tuning the crystal structure and properties
Source: Royal Society of Chemistry journal article supplement (doi:10.1039/d1ra02856a), 2021-01-01
Supplement: d1ra02856a1.pdf [file d1ra02856a1.pdf]

## Electronic supporting information

### Different view of solvents effect on the synthesis methods of Zeolitic Imidazolate Framework-8 to tuning the crystal structure and properties

Arezoo Akhundzadeh Tezerjani<sup>a</sup>, Rouein Halladj<sup>a\*</sup>, Sima Askari<sup>b</sup>

<sup>a</sup> Department of Chemical Engineering, Amirkabir University of Technology, Tehran, Tel: 0098-2164543151, Fax: 0098-2166405847.

<sup>b</sup> Department of Chemical Engineeringt, Science and Research Branch, Islamic Azad University, Tehran, Iran.

\*Corresponding author: Dr. Rouein Halladj; E-mail address: [halladj@aut.ac.ir](mailto:halladj@aut.ac.ir)

| <b>Table of Contents</b>  | <b>Page</b> |
|---------------------------|-------------|
| Experimental Section      | S2          |
| Fig. S1                   | S3          |
| Fig. S2                   | S3          |
| Fig. S3                   | S4          |
| Fig. S4                   | S4          |
| Fig. S5                   | S5          |
| Fig. S6                   | S5          |
| Fig. S7                   | S6          |
| Fig. S8                   | S6          |
| Fig. S9                   | S7          |
| Table S1                  | S8          |
| Product yield calculation | S8          |
| Reference                 | S8          |

## **Experimental Section**

### **Synthesis ZIF-8 by Mixing method**

To prepare the ZIF-8 sample, First, 3 g zinc nitrate hexahydrate ( $\text{Zn}(\text{NO}_3)_2$ ) and 6.6 g 2-methylimidazole (HMIM) were separately dissolved in 50 ml solvent (methanol, DMF, water) and stir until a clear solution was obtained. Then two solutions were stirred for 6 h at ambient temperature and pressure on the magnetic stirrer to give a milky solution. The resulting slurry solution was separated by centrifugation and washed 3 times with methanol to remove unreacted raw materials and impurities. Finally, to dry the resulting product, it was placed in the oven at 120 °C for 12 hours.

### **Synthesis ZIF-8 by Solvothermal method**

To prepare the ZIF-8 sample, First, 3 g zinc nitrate hexahydrate ( $\text{Zn}(\text{NO}_3)_2$ ) and 6.6 g 2-methylimidazole (HMIM) were separately dissolved in 50 ml solvent (methanol, DMF, water) and stir until a clear solution was obtained. Then the two solutions were loaded in 80ml Teflon lined stainless steel autoclave and autoclave was placed in convection oven at 140 °C for 24 hours. The resulting slurry solution was separated by centrifugation and washed 3 times with methanol to remove unreacted raw materials and impurities. Finally, to dry the resulting product, it was placed in the oven at 120 °C for 12 hours.

### **Synthesis ZIF-8 by Sonochemical method**

To prepare the ZIF-8 sample, First, 3 g zinc nitrate hexahydrate ( $\text{Zn}(\text{NO}_3)_2$ ) and 6.6 g 2-methylimidazole (HMIM) were separately dissolved in 50 ml solvent (methanol, DMF, water) and stir until a clear solution was obtained. Then the two solutions were blended and it was held under ultrasonic waves with frequency of 50 Hz and voltage of 200 V with 100% ultrasonic power intensity for one-hour period. Also, the synthesis temperature was maintained by placing the solution in a bath water. The resulting slurry solution was separated by centrifugation and washed 3 times with methanol to remove unreacted raw materials and impurities. Finally, to dry the resulting product, it was placed in the oven at 120 °C for 12 hours.

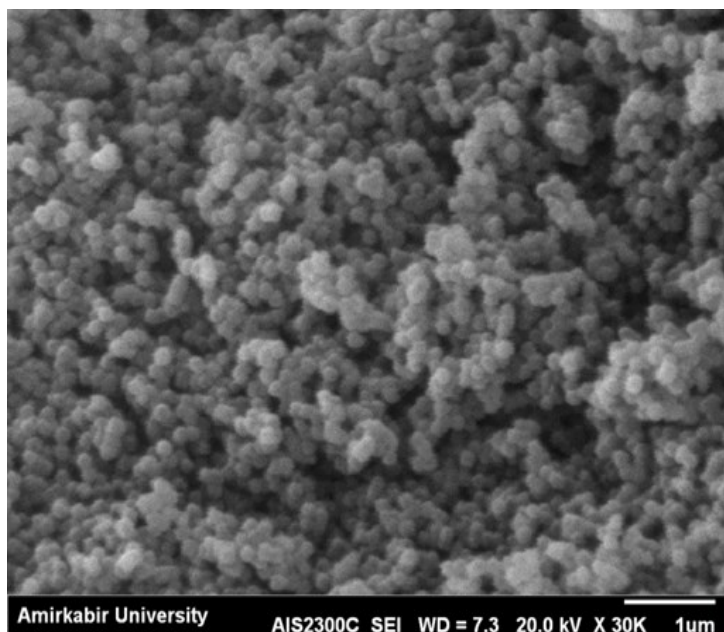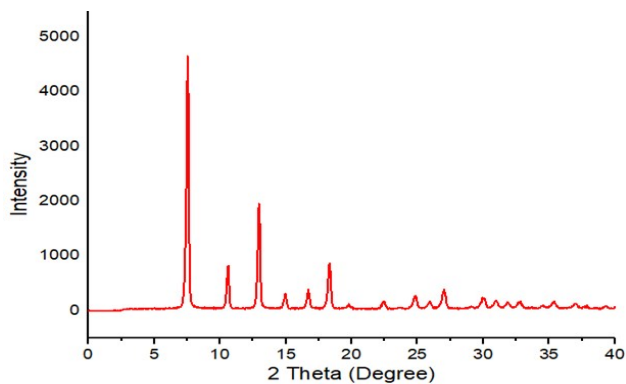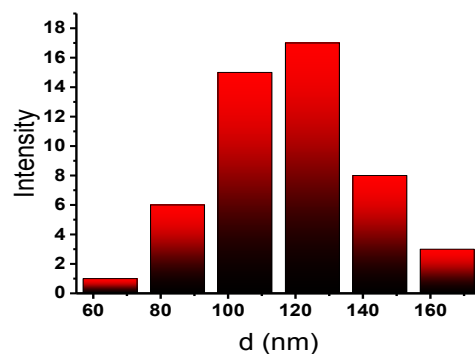

Fig. S1. Sem image, XRD pattern and particle size distribution of ZIF-8 sample synthesized in methanol at mixing method.

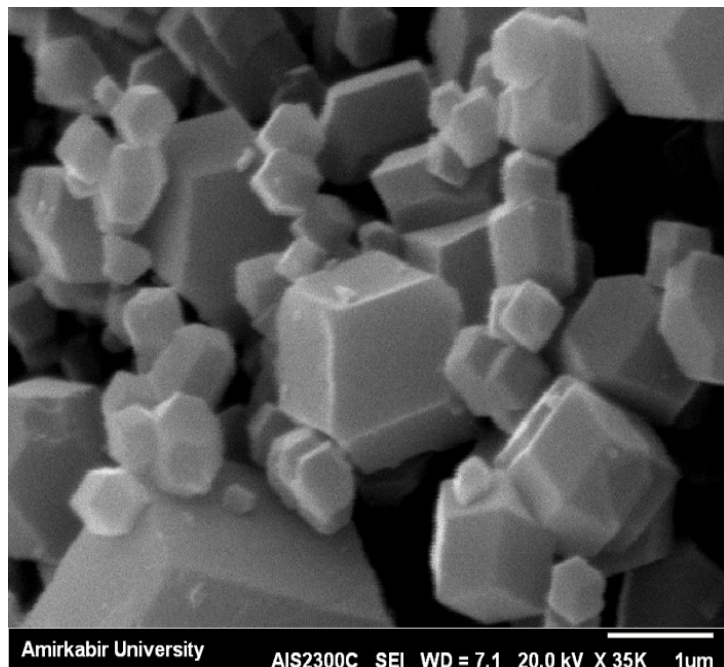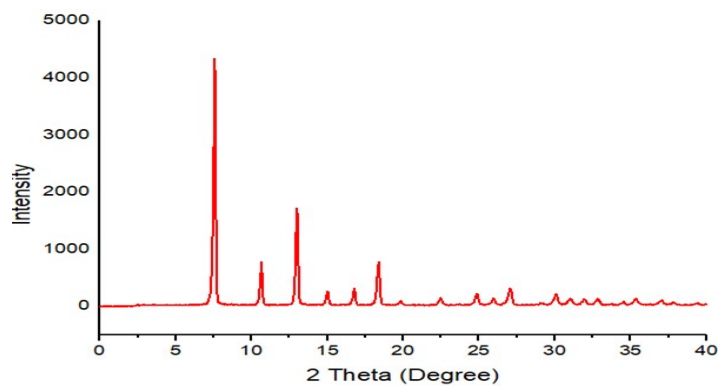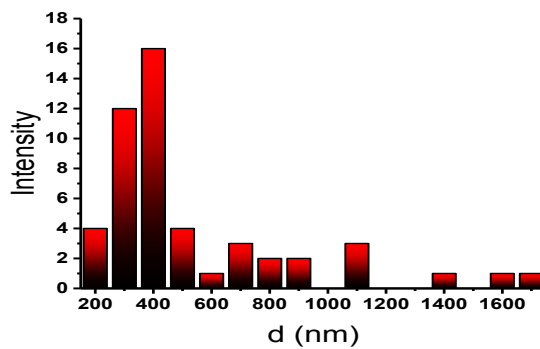

Fig. S2. Sem image, XRD pattern and particle size distribution of ZIF-8 sample synthesized in methanol at solvothermal method.

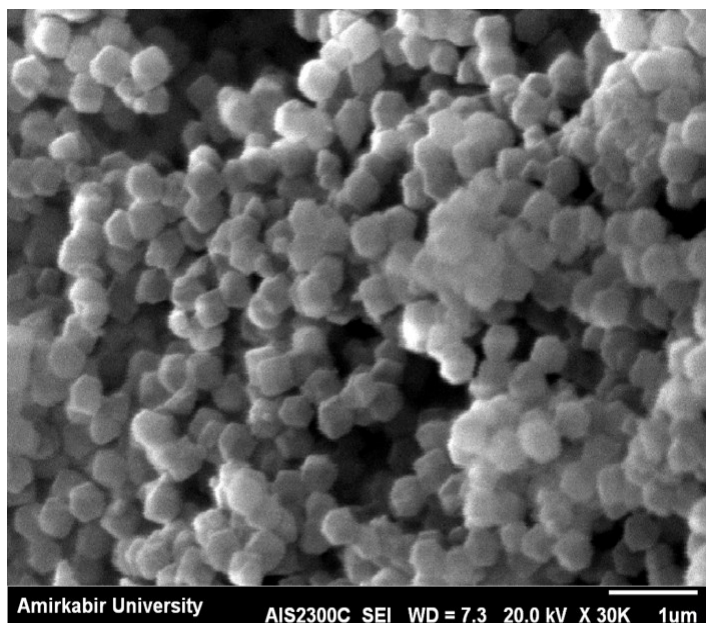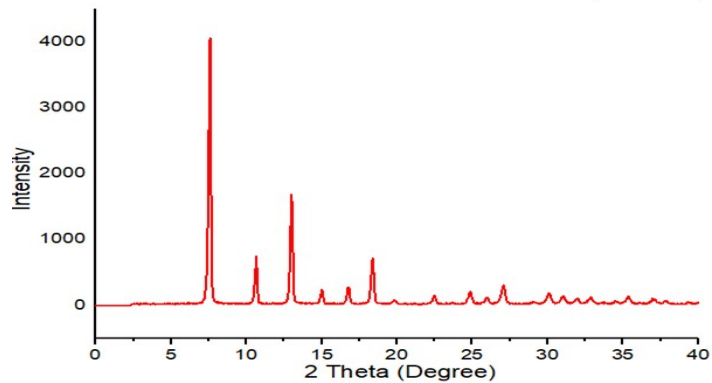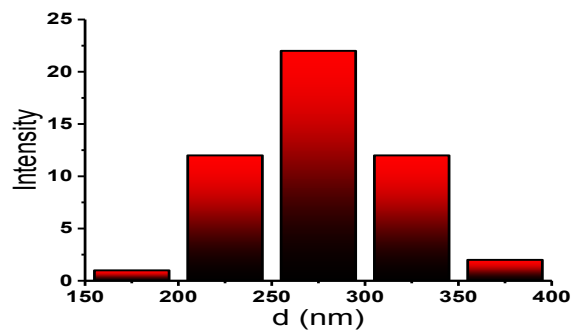

**Fig. S3.** Sem image, XRD pattern and particle size distribution of ZIF-8 sample synthesized in methanol at sonochemical method.

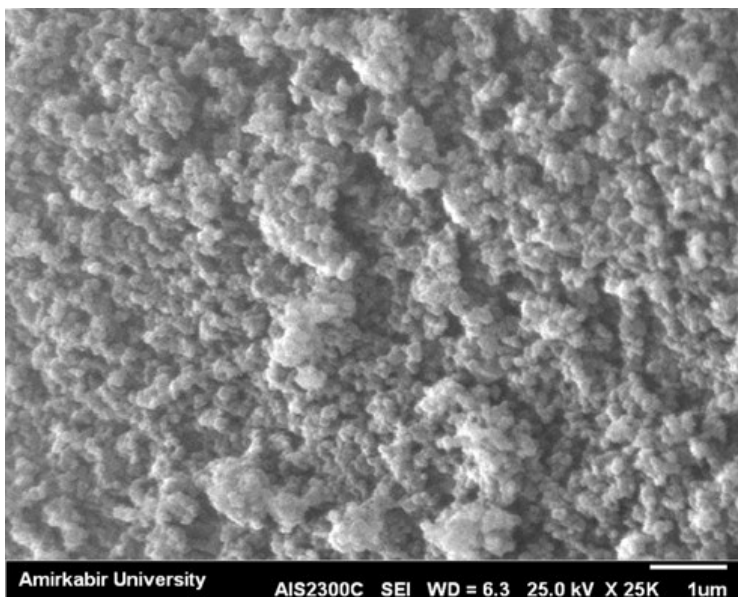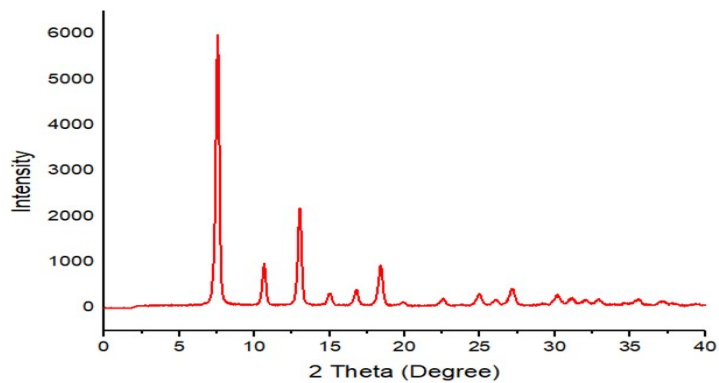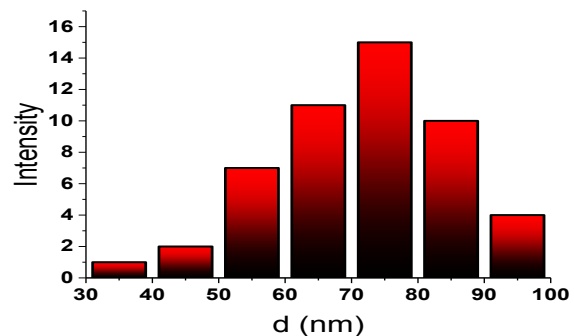

**Fig. S4.** Sem image, XRD pattern and particle size distribution of ZIF-8 sample synthesized in DMF at mixing method.

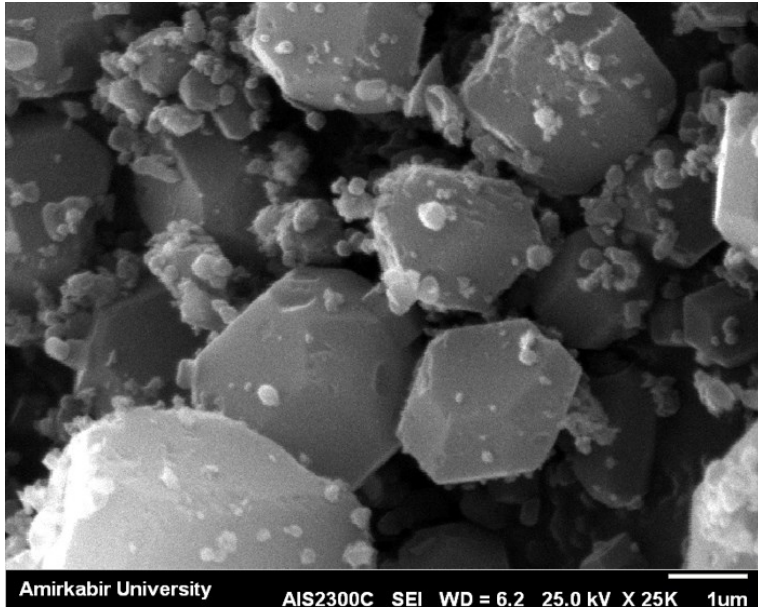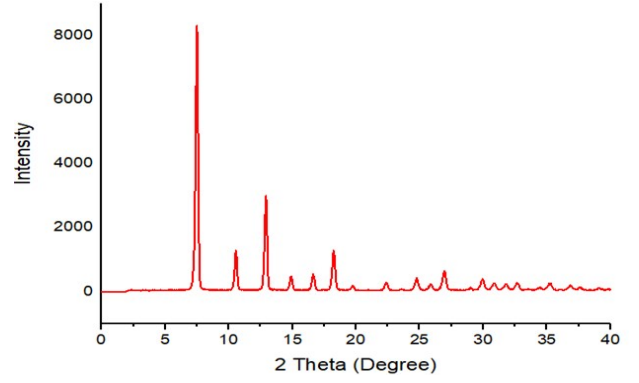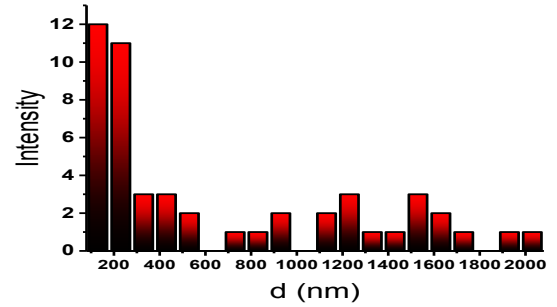

Fig. S5. Sem image, XRD pattern and particle size distribution of ZIF-8 sample synthesized in DMF at solvothermal method.

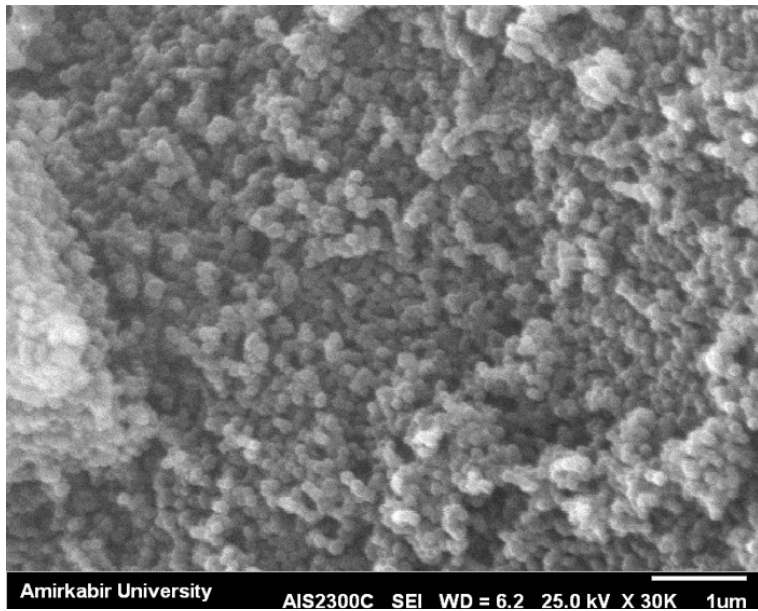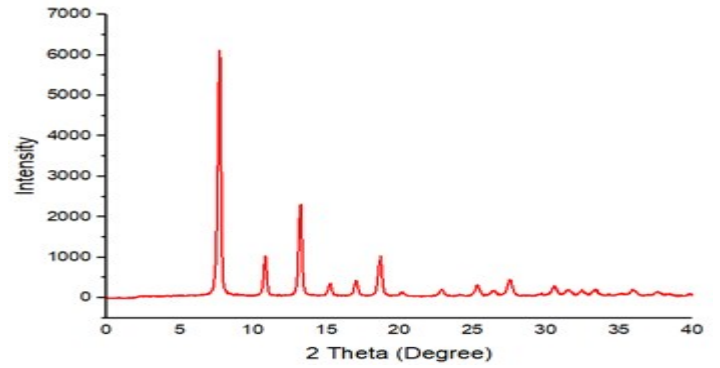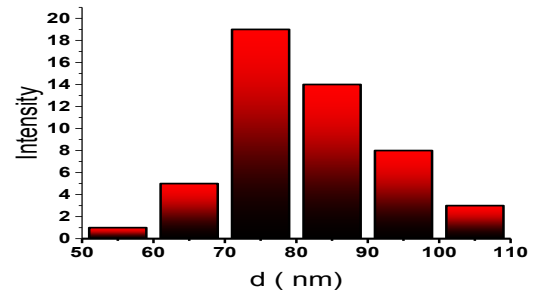

Fig. S6. Sem image, XRD pattern and particle size distribution of ZIF-8 sample synthesized in DMF at sonochemical method.



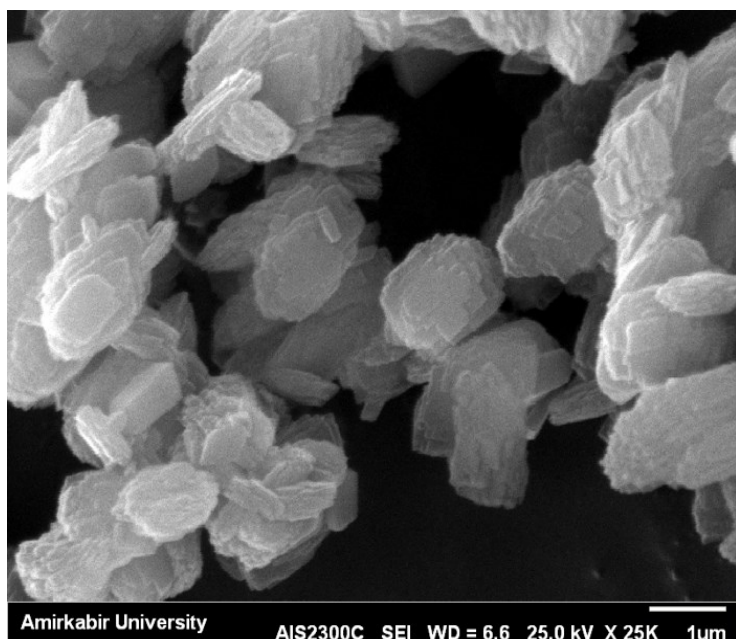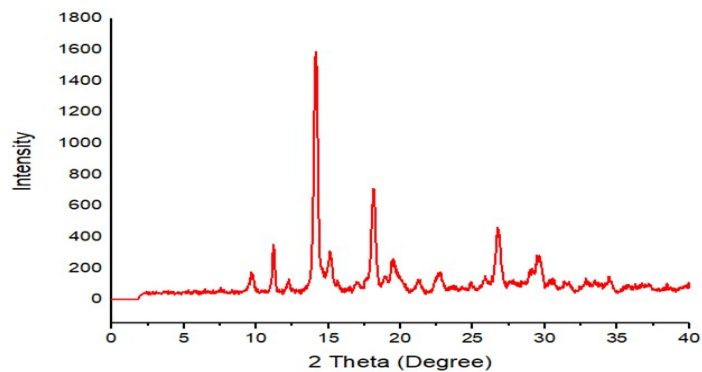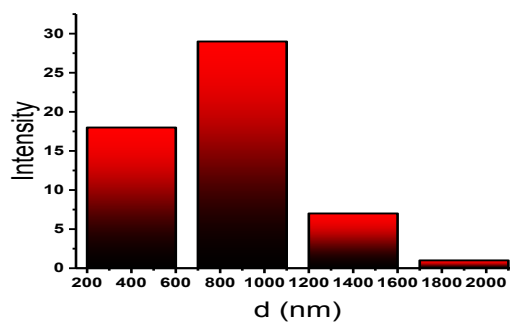

**Fig. S7.** Sem image, XRD pattern and particle size distribution of ZIF-8 sample synthesized in water at mixing method.

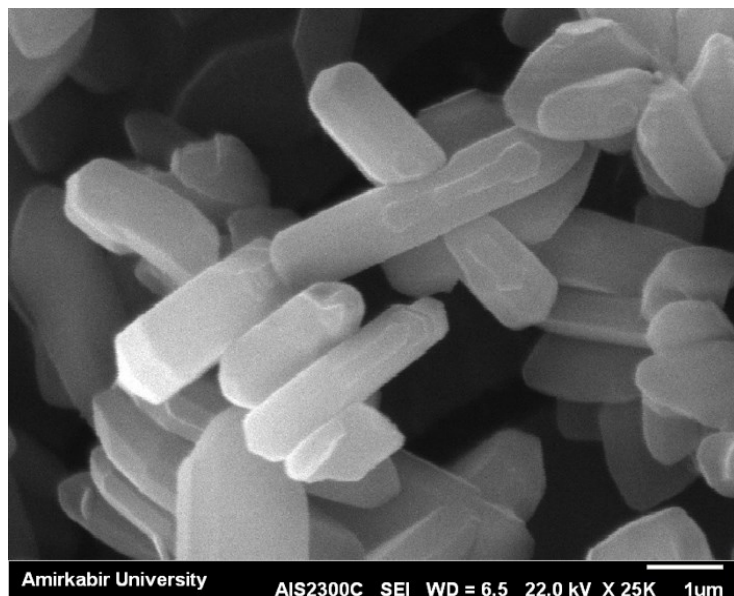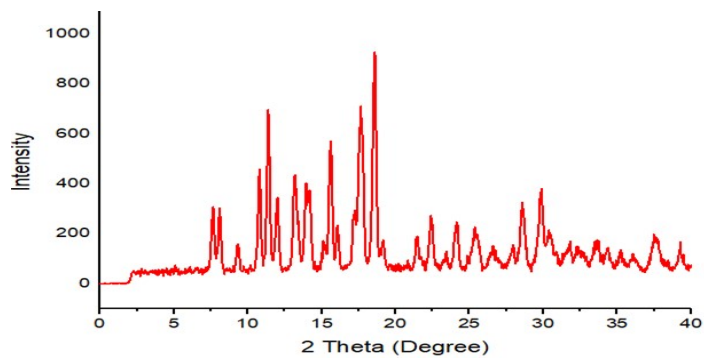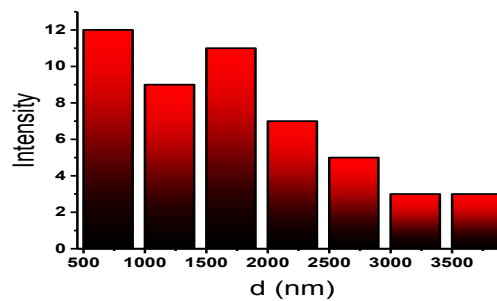

**Fig. S8.** Sem image, XRD pattern and particle size distribution of ZIF-8 sample synthesized in water at solvothermal method.

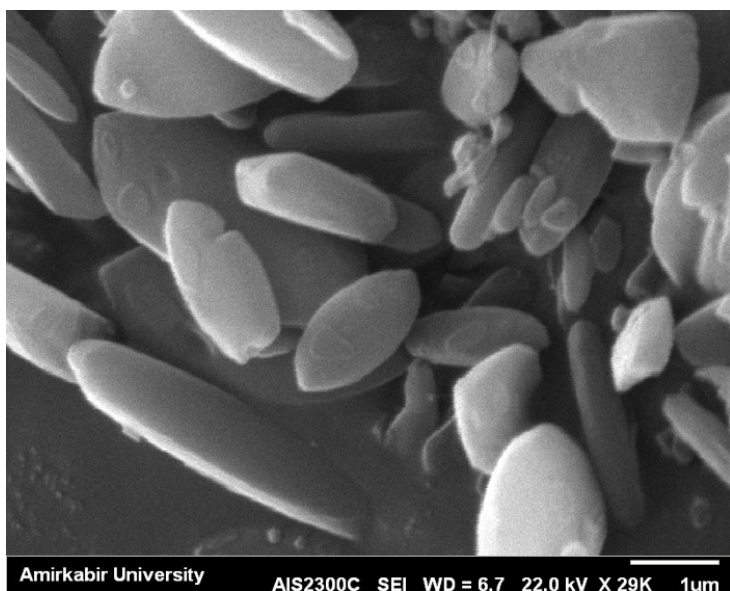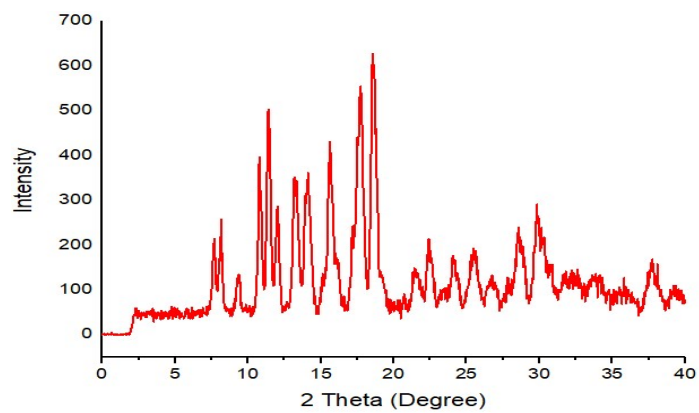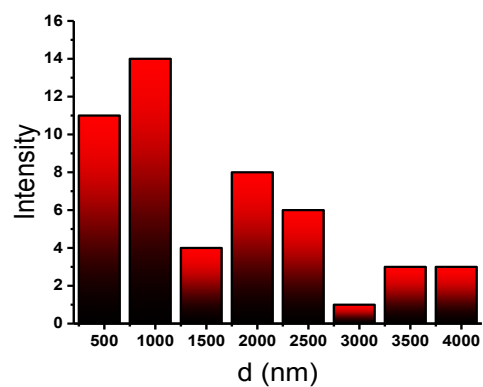

**Fig. S9.** Sem image, XRD pattern and particle size distribution of ZIF-8 sample synthesized in water at sonochemical method.

**Table S1.** Dielectric constant, dipole moment, and van der Waals volume for solvents[1].

| Solvent | Dielectric constant | Dipole moment(D) | Van der waals volume (cm <sup>3</sup> mol <sup>-1</sup> ) |
|---------|---------------------|------------------|-----------------------------------------------------------|
| MeOH    | 33                  | 1.70             | 21.71                                                     |
| DMF     | 38                  | 3.82             | 47.67                                                     |
| Water   | 80                  | 1.85             | 11.44                                                     |

### Product yield calculation

The product yield is the ratio of the amount of product obtained from experiment to the amount of reactants, according to the following equation:

$$\text{percent of product yield} = \frac{\text{amount of product}}{\text{amount of reactants}} \times 100$$

### Reference

- 1- C.-P. Li and M. Du, "Role of solvents in coordination supramolecular systems," Chemical Communications, vol. 47, no. 21, pp. 5958-5972, 2011.
